# Supplementary material for: Machine Learning Reveals Strong Grid-Scale Dependence in the Satellite N d –LWP Relationship
Source: Copernicus journal article supplement (doi:10.5194/egusphere-2025-3850), 2025-08-21
Supplement: Supplementary file 1 [file egusphere-2025-3850-supplement.pdf]

# Supporting Information: Machine Learning Reveals Strong Grid-Scale Dependence in the Satellite $N_d$ –LWP Relationship

Matthew W. Christensen<sup>1</sup>, Andrew Geiss<sup>1</sup>, Adam C. Varble<sup>1</sup>, and Po-Lun Ma<sup>1</sup>

<sup>1</sup>Atmospheric, Climate, and Earth Sciences Division, Pacific Northwest National Laboratory, Richland, WA 99354, Washington, USA

**Correspondence:** Matthew Christensen (matt.christensen@pnnl.gov)

*Copyright statement.* TEXT

## 1 Contents of this file:

- Figure S1 – S17
- Table S1

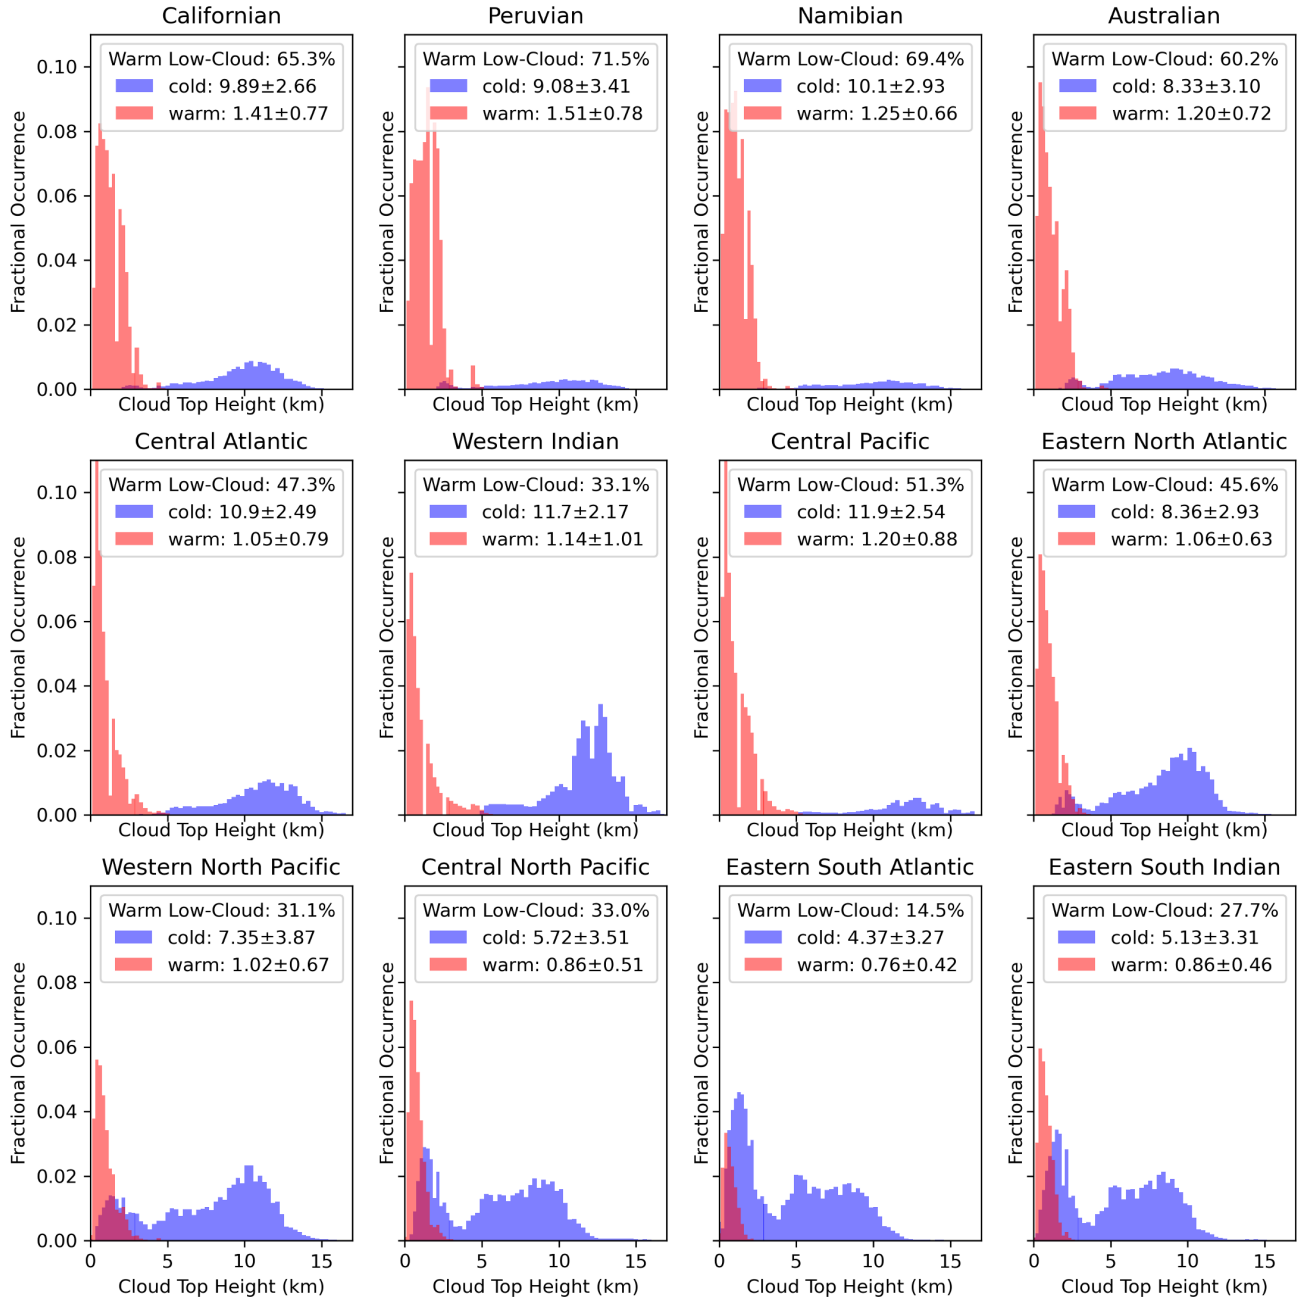

**Figure S1.** Histogram showing the fractional occurrence of the number of MODIS-retrieved cloud top heights grouped into 75 bins, divided by the total number of possible L2 pixels, sorted by warm (CTT > 273 K) and cold (CTT < 273 K) cloud top temperatures for each region in this study. The percentage of warm low-level clouds below 3 km, along with the mean and standard deviation of the cloud top heights for each distribution, are provided.

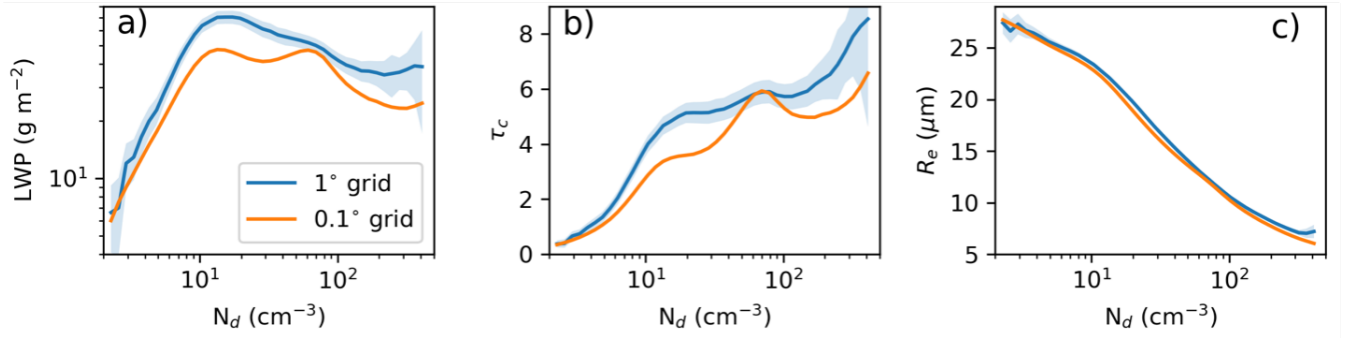

**Figure S2.** Median LWP (a), cloud optical thickness ( $\tau_c$ ) (b), and droplet effective radius ( $R_e$ ) from 50 bins increasing by the log in  $N_d$  for 5 years of data across the Peru region using the same data but averaged into 1° (blue) and 0.1° (orange) grids.

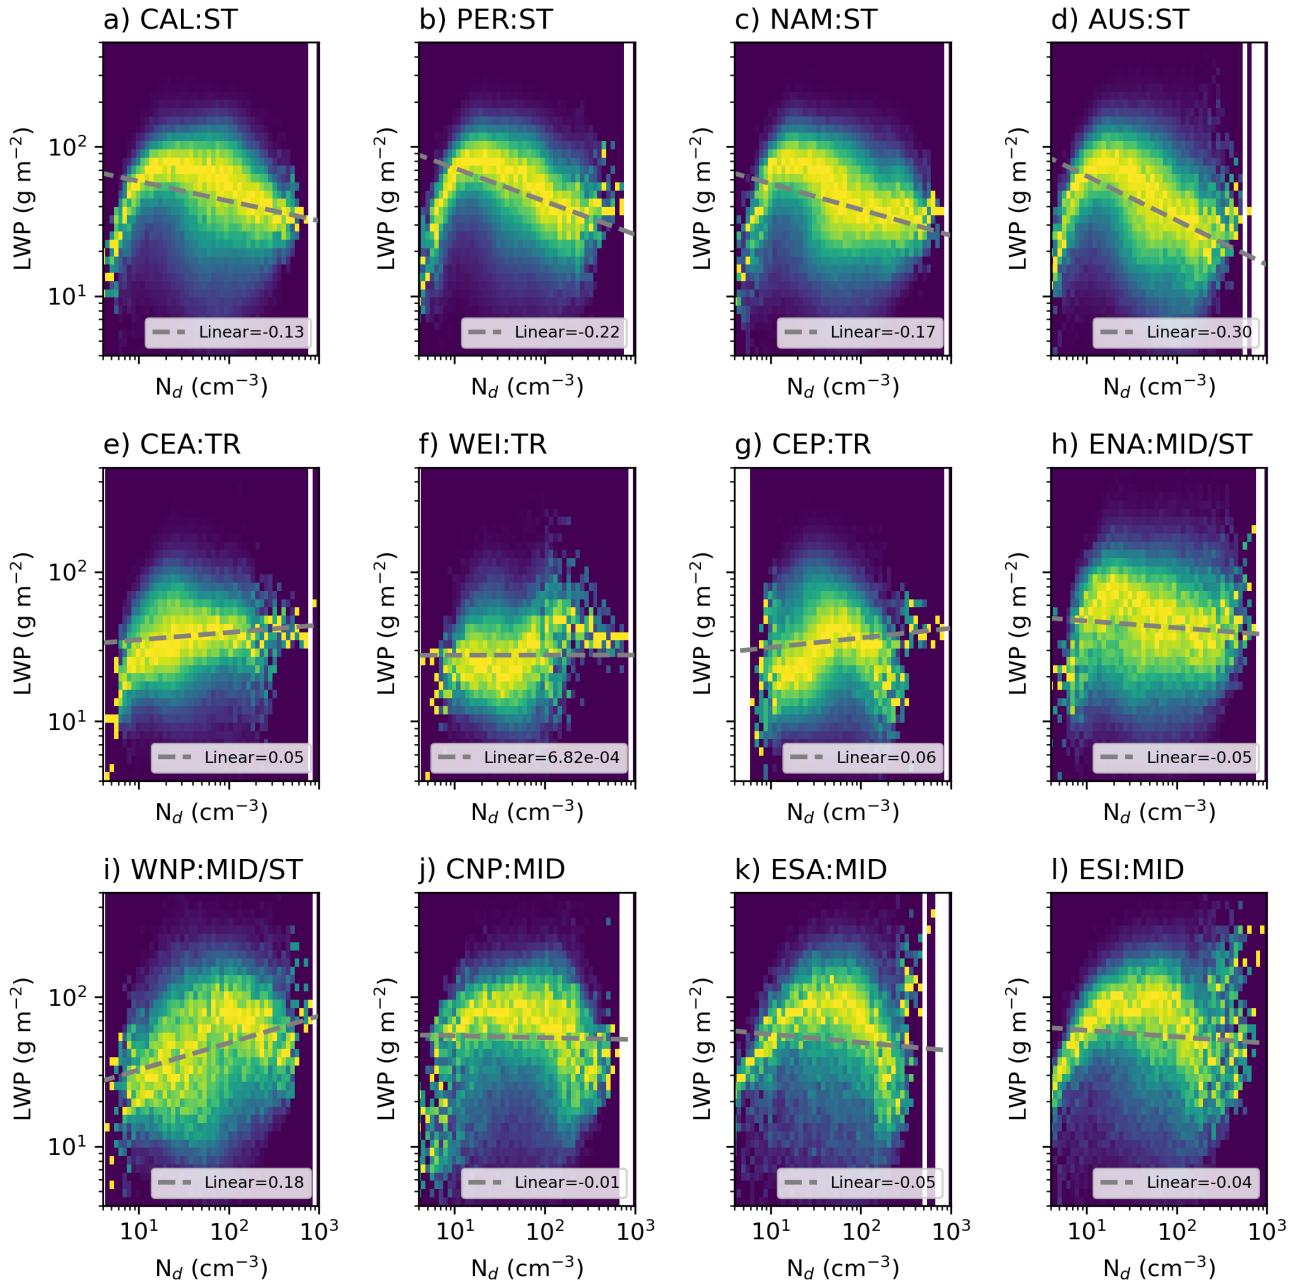

**Figure S3.** The  $N_d$ –LWP relationship expressed using a 2D histogram of the joint frequencies of the LWP and  $N_d$  normalized by the bin number of  $N_d$  using 5 years of MODIS cloud retrievals aggregated at  $1^\circ$  spatial scale resolution over  $20^\circ \times 20^\circ$  domain for each region described in Figure 1 of this study. Subtropical (ST), Tropical (TR), Midlatitude (MID), and mixed (MID/ST) regions are denoted followed by the prefix name of the region. Linear least squares fit (gray dashed line) and associated slope values are provided.



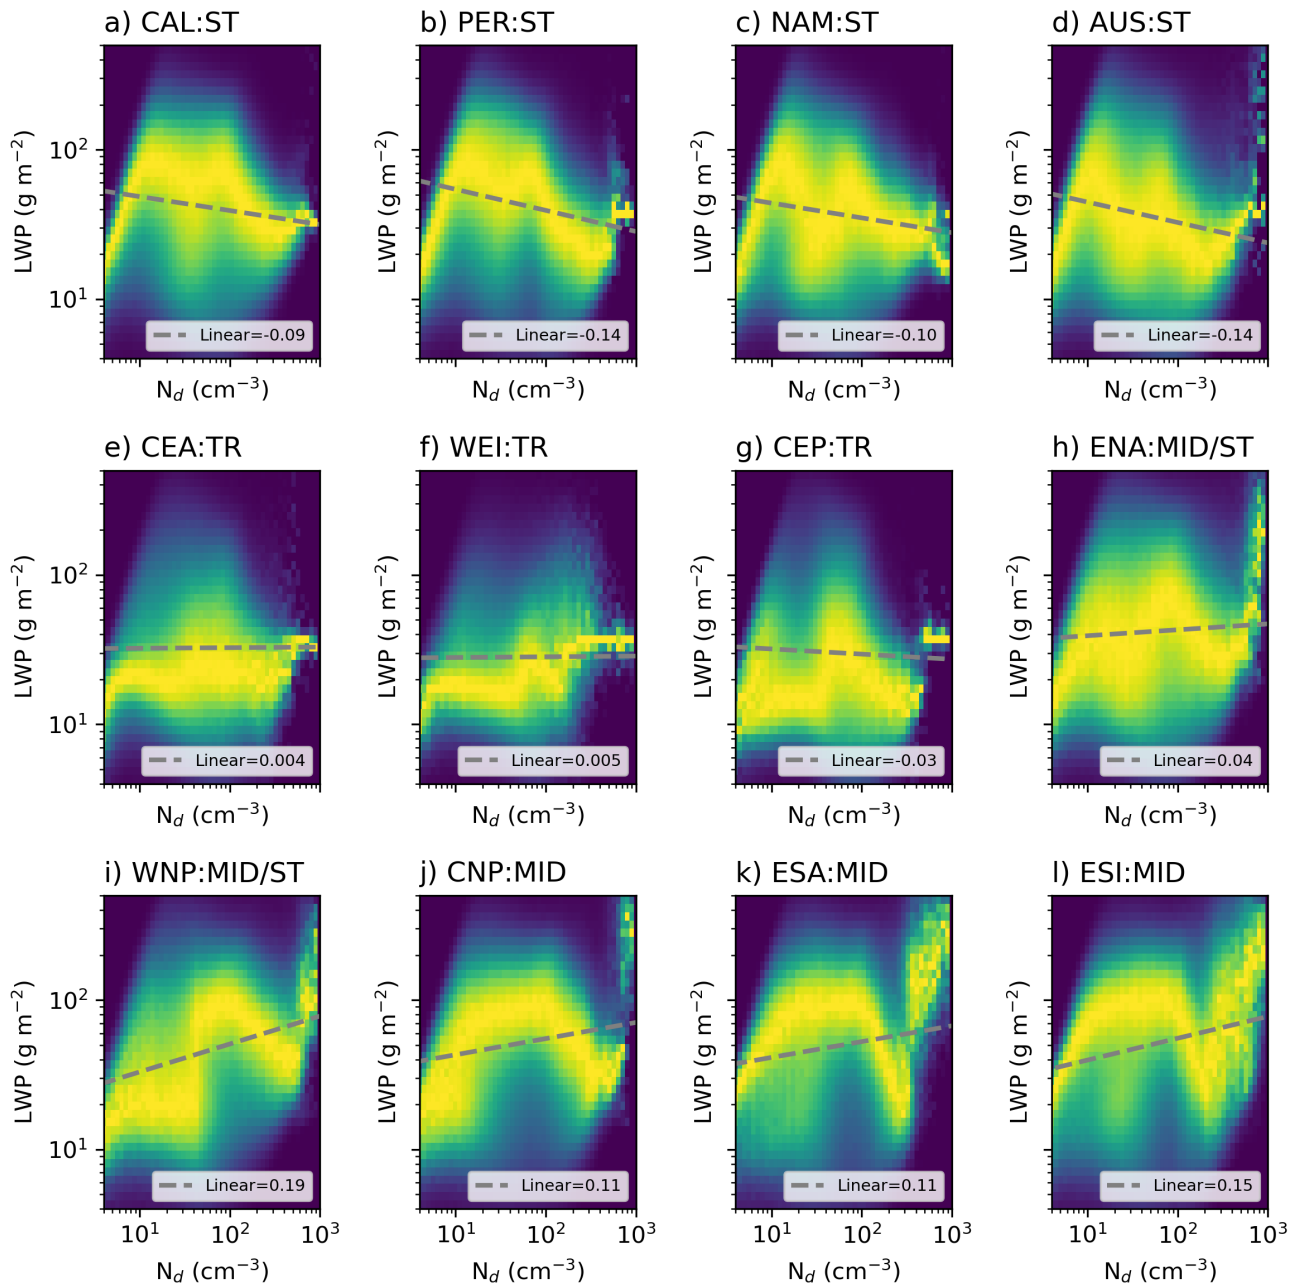

**Figure S4.** Same as Figure SFigE3 except using  $0.1^\circ$  spatial resolution data.

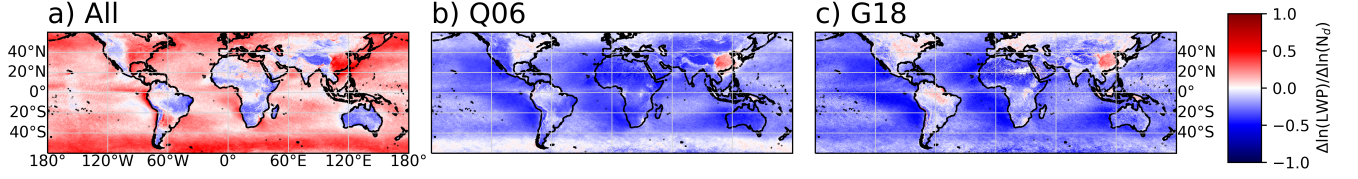

**Figure S5.** Linear least squares fit between the log of LWP and log of  $N_d$  using each composite: all a), **Q06** b), and **G18** c) for each  $0.1^\circ$  region of the globe for the 5 year period.

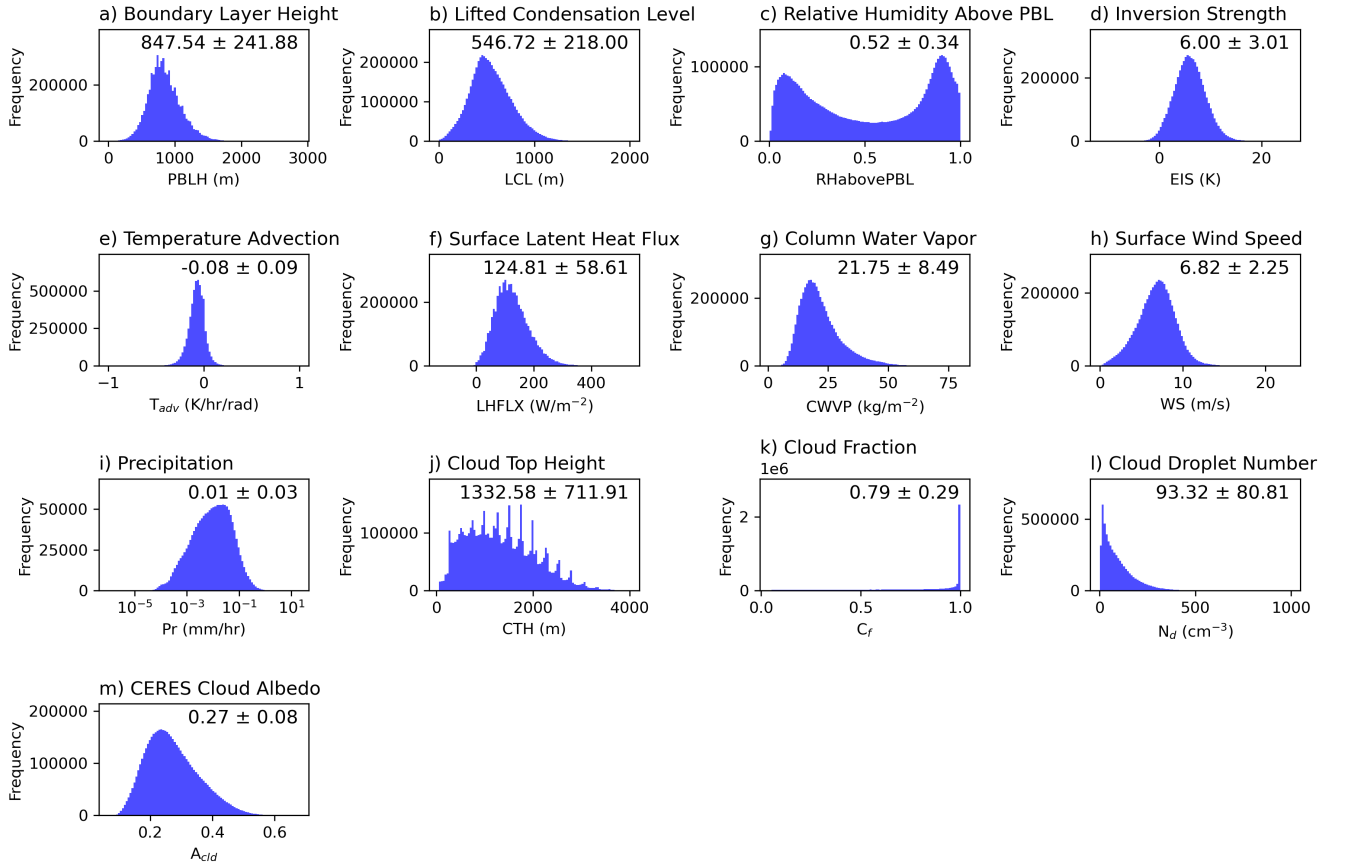

**Figure S6.** Histograms of the input predictor variables (a – o) into the random forest model shown for 5 years of 1degree data over the California region. Means and standard deviations are provided on each sub-plot.

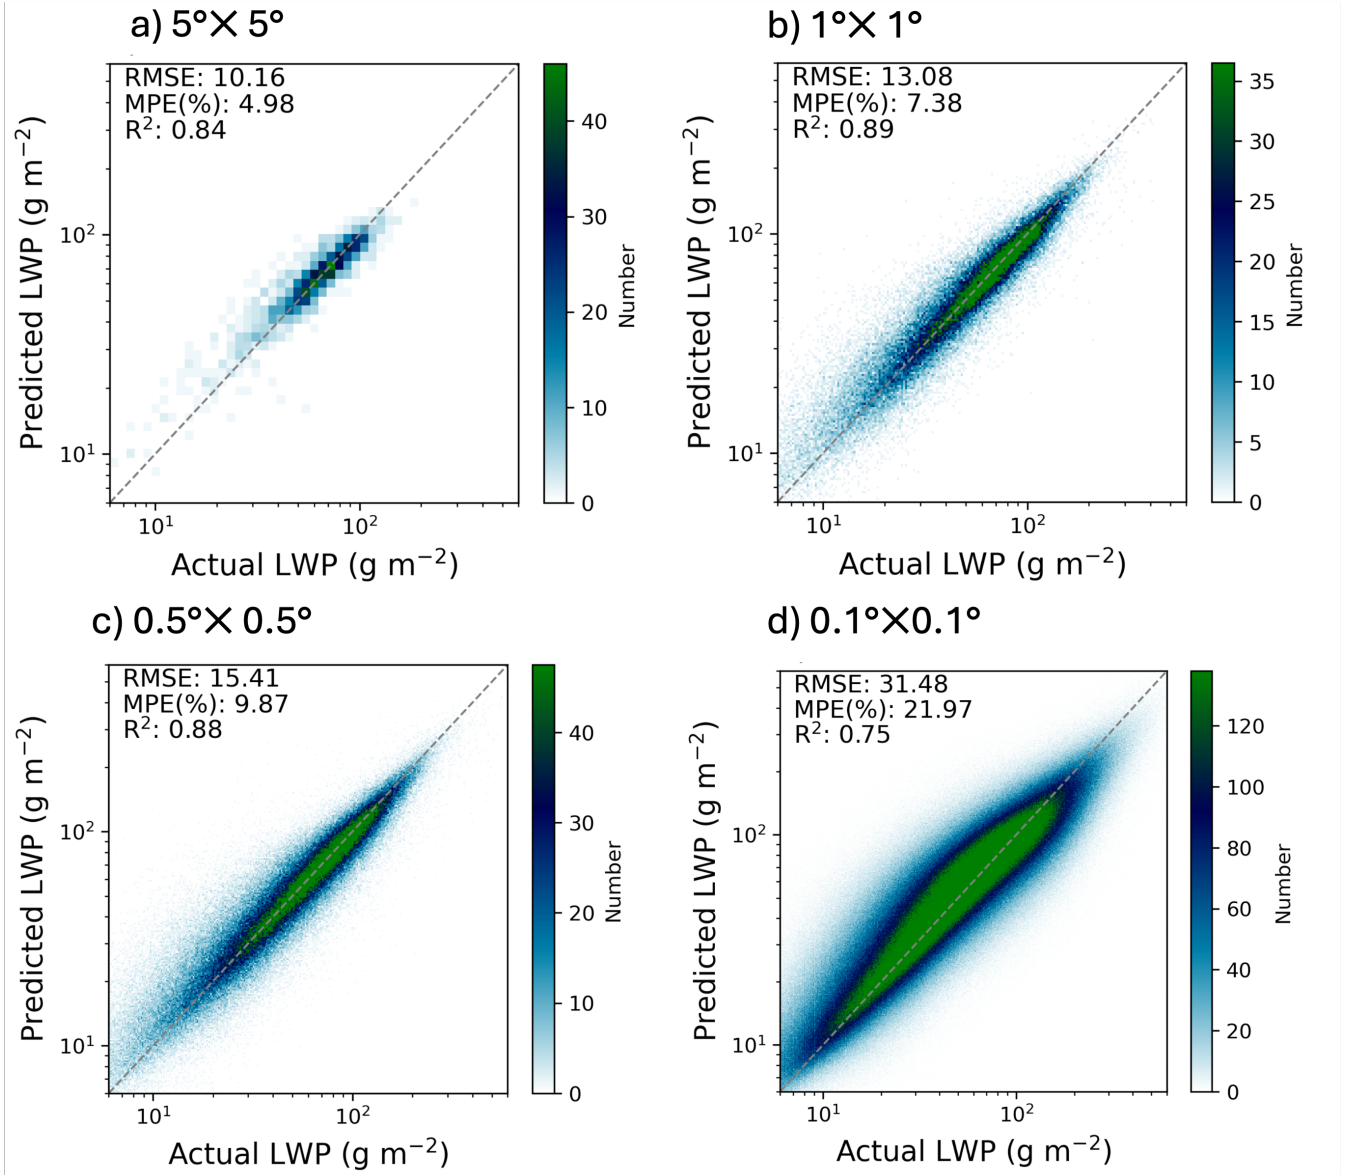

**Figure S7.** Random forest model predictions of LWP as a function of  $N_d$  for  $5^\circ$  (a),  $1^\circ$  (b),  $0.5^\circ$  (c), and  $0.1^\circ$  (d) spatial resolutions.

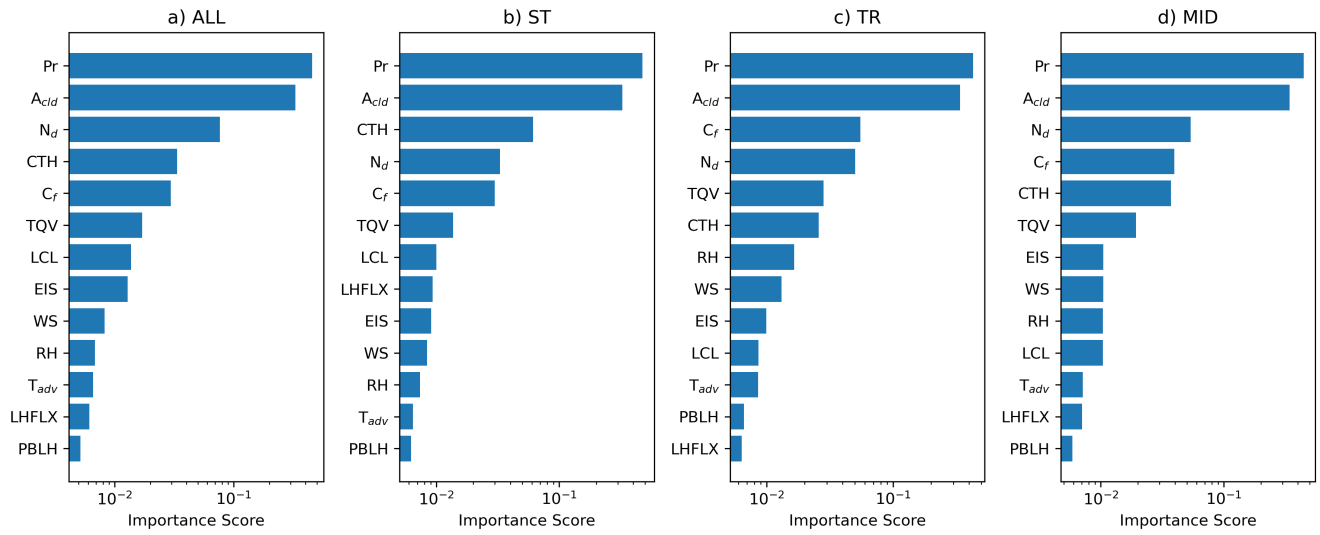

**Figure S8.** Random forest feature importance score in the  $N_d$ -LWP relationship shown for the combined subtropical (ST), tropical (TR), and midlatitude (MID) locations in Figure 1. Values are normalized and summed for each region.

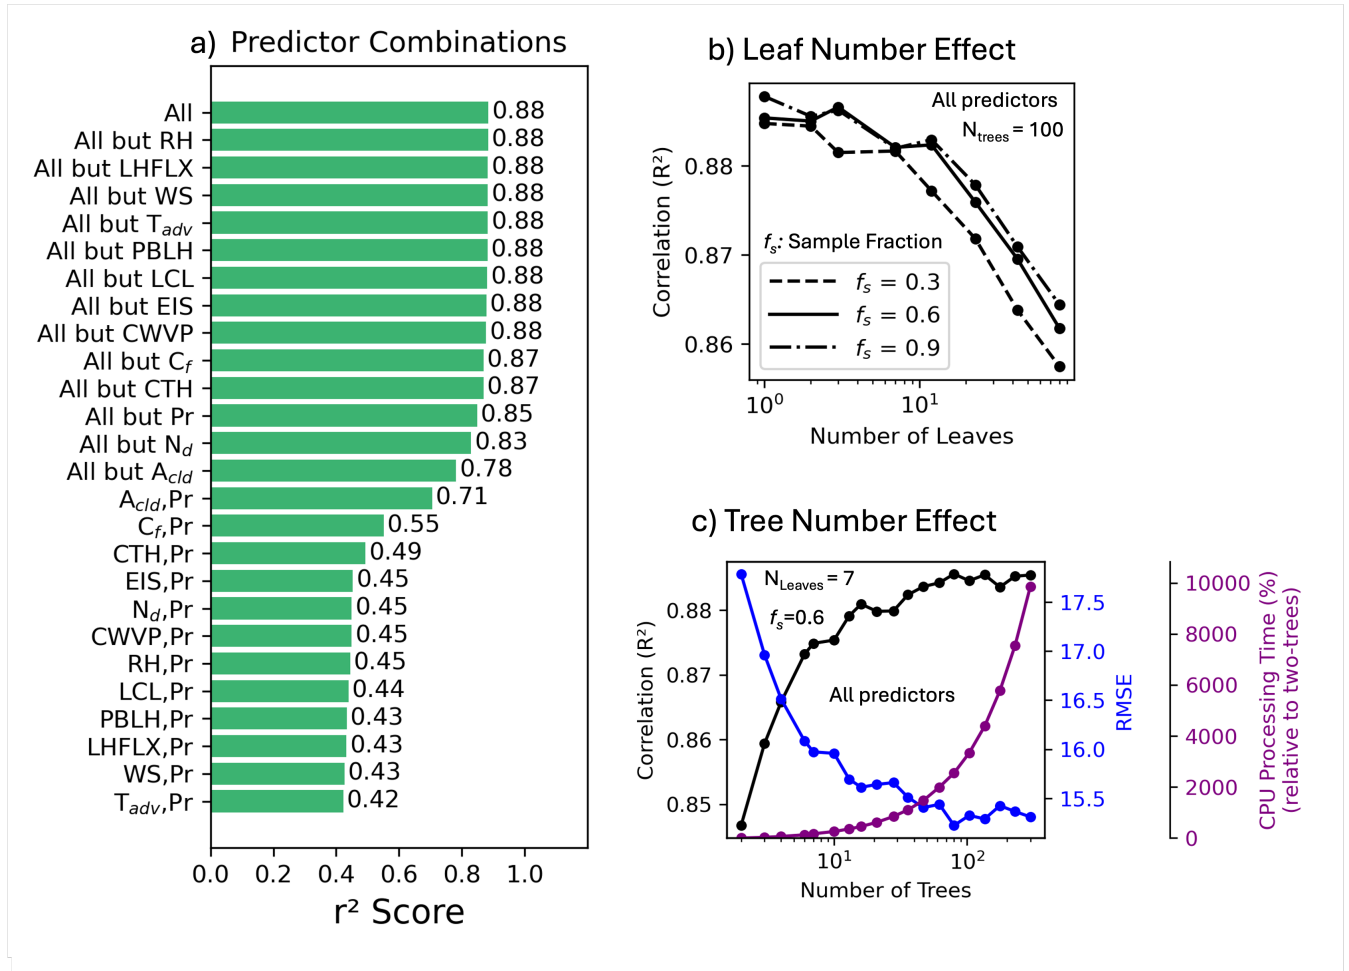

**Figure S9.** Sensitivity of model performance to hyperparameter and predictor selection at  $1^\circ$  resolution. Coefficient of determination ( $r^2$ ) for models trained using different predictor combinations, where All refers to all 13 cloud controlling variables (a). Impact of the minimum number of samples per leaf node on  $r^2$  for sample fractions of 0.3 (dashed), 0.6 (solid), and 0.9 (dashed-dotted). Effect of the number of trees on RMSE,  $r^2$ , and CPU processing time normalized by training the model with 2-trees (c).

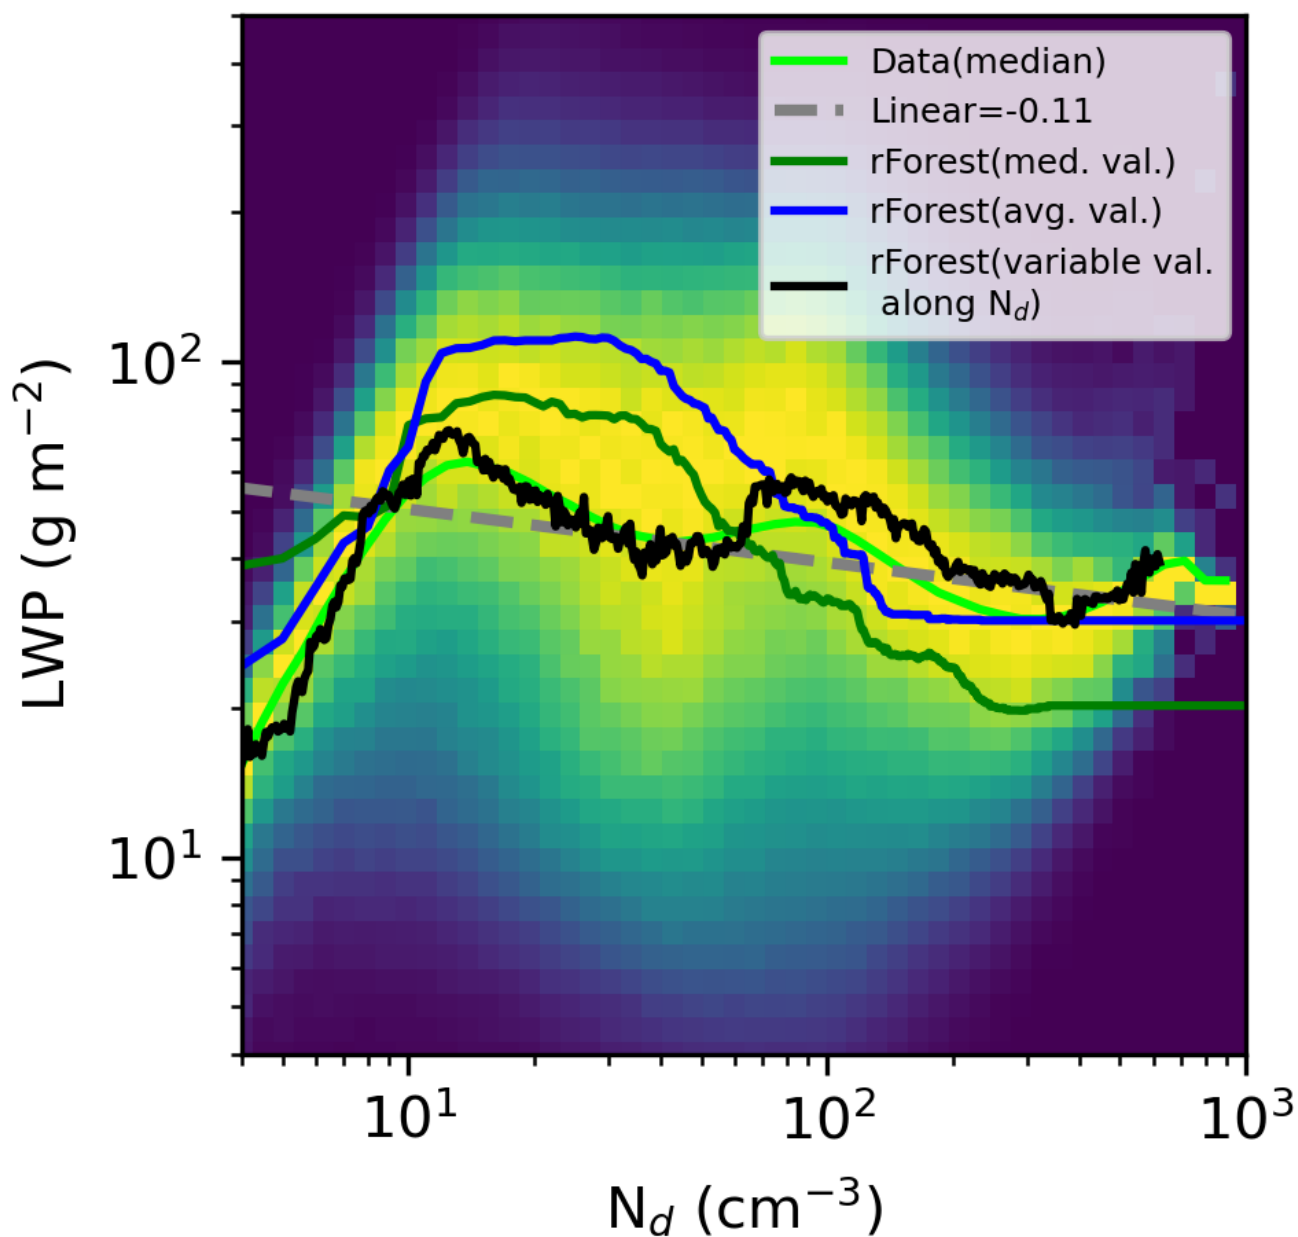

**Figure S10.** The  $N_d$ -LWP relationship displayed as a 2D histogram normalized by the maximum number of retrievals in each  $N_d$  bin, using 5 years of MODIS cloud retrievals aggregated at  $0.05^\circ$  resolution for California. The light green line represents the median of the actual data distribution, while the dark green, blue, and black lines correspond to random forest (rForest) model predictions of LWP based on single median values, single mean values, and varying the median of all cloud-controlling factors within each  $N_d$  bin, respectively. Linear least squares fit (gray dashed line) and associated slope value is provided.

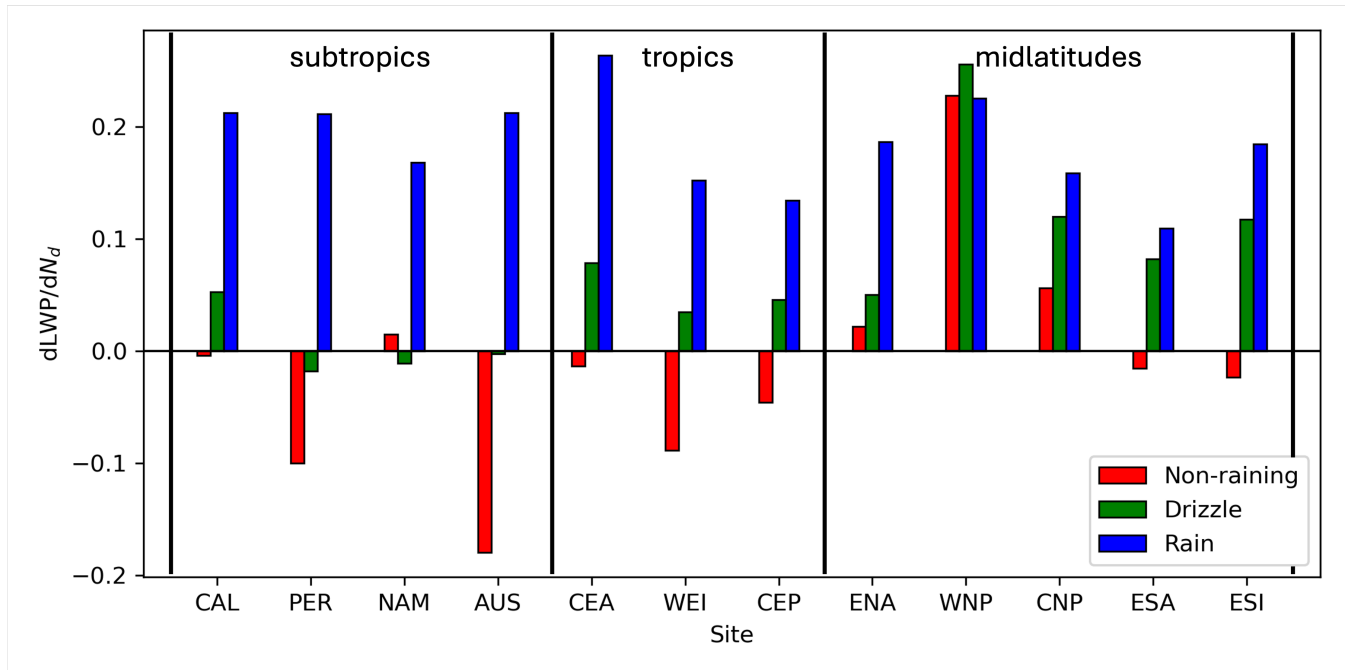

**Figure S11.** Linear least squares fit of the  $N_d$ -LWP MODIS relationship using the  $0.1^\circ$  product displayed for each region where the data was considered non-raining ( $Pr = 0$  mm/hr; red), drizzling ( $0 < Pr < 0.05$  mm/hr; green), and raining ( $0.05 < Pr < 2.0$  mm/hr; blue) from AMSRE retrievals.

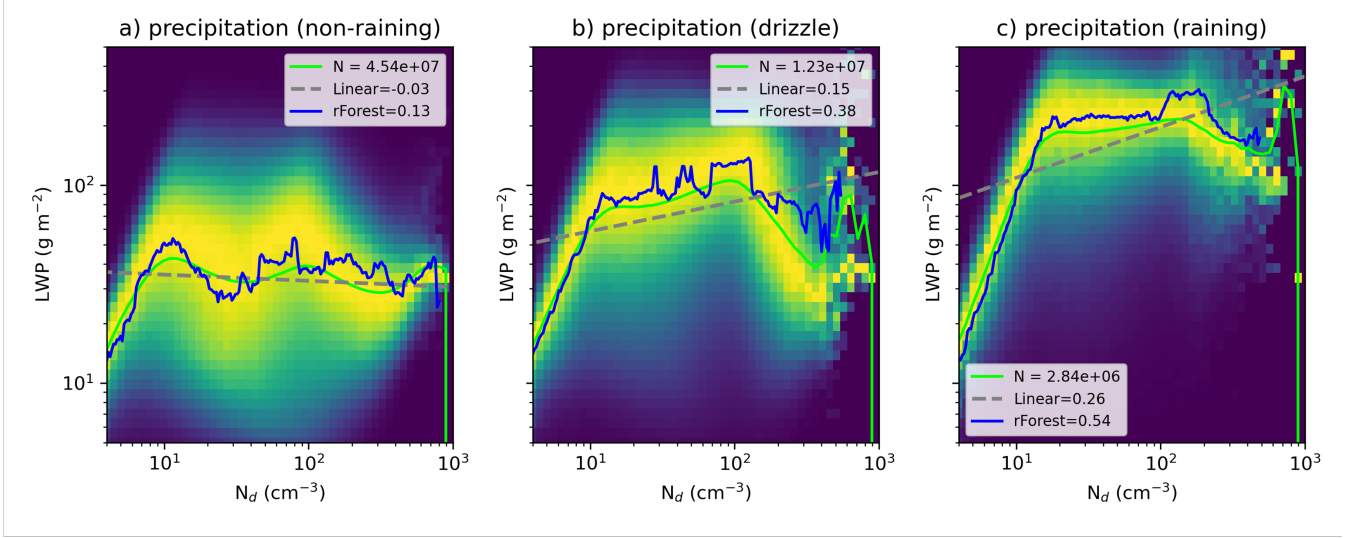

**Figure S12.** The  $N_d$ -LWP relationship, using the same criteria as Fig. S10, but composited by surface precipitation rate: (a) 0 mm/hr (non-raining clouds), (b)  $0 < \text{Pr} < 0.05$  mm/hr (drizzle), and (c)  $0.05 < \text{Pr} < 0.2$  mm/hr (rain). An ordinary least squares (OLS) fit to the observational data (dashed gray line) and to the random forest prediction (solid blue line), along with the average slope estimated by numerical differentiation of the prediction using finite differences, are shown for constant surface precipitation values: 0 mm/hr (non-raining), 0.01 mm/hr (drizzle), and 0.1 mm/hr (rain). Note, the remaining cloud controlling variables are allowed to change as a function of  $N_d$ .



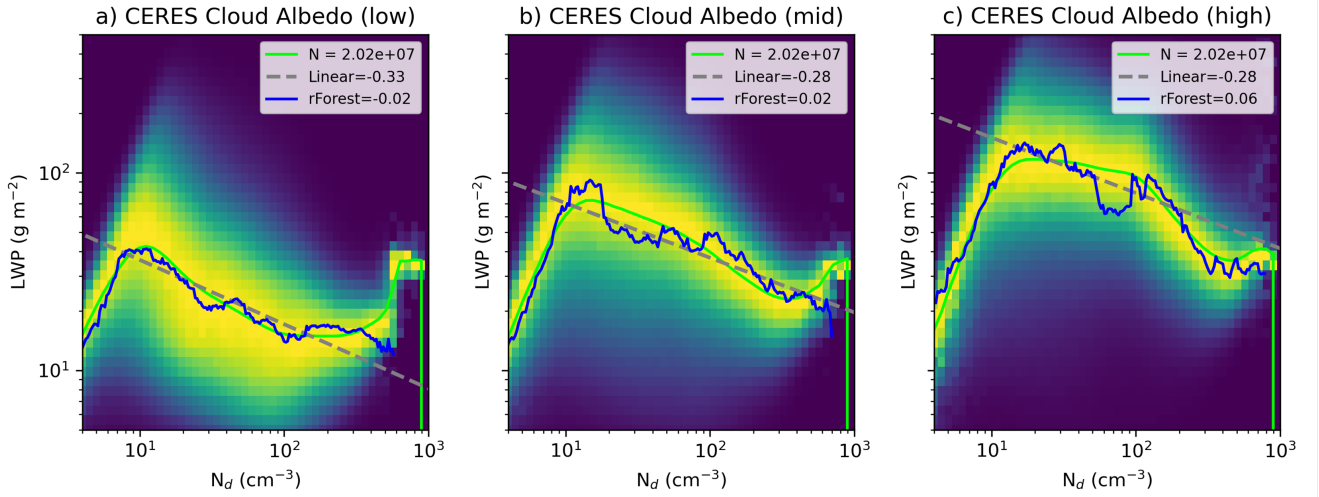

**Figure S13.** The  $N_d$ -LWP relationship plotted using the same criteria as Fig. S10 but composited by CERES cloud albedo, low cloud albedo ( $0 < A_{cld} < 0.25$ ) (a), mid cloud albedo ( $0.25 < A_{cld} < 0.4$ ) (b), and high cloud albedo ( $0.4 < A_{cld} < 1$ ) (c). An OLS fit to the observational data (dashed gray line) and to the random forest prediction (solid blue line), along with the average slope estimated by numerical differentiation of the prediction using finite differences, are shown for constant cloud albedo values: 0.2 for low, 0.3 for mid, and 0.325 for high. Note, the remaining cloud controlling variables are allowed to change as a function of  $N_d$ .

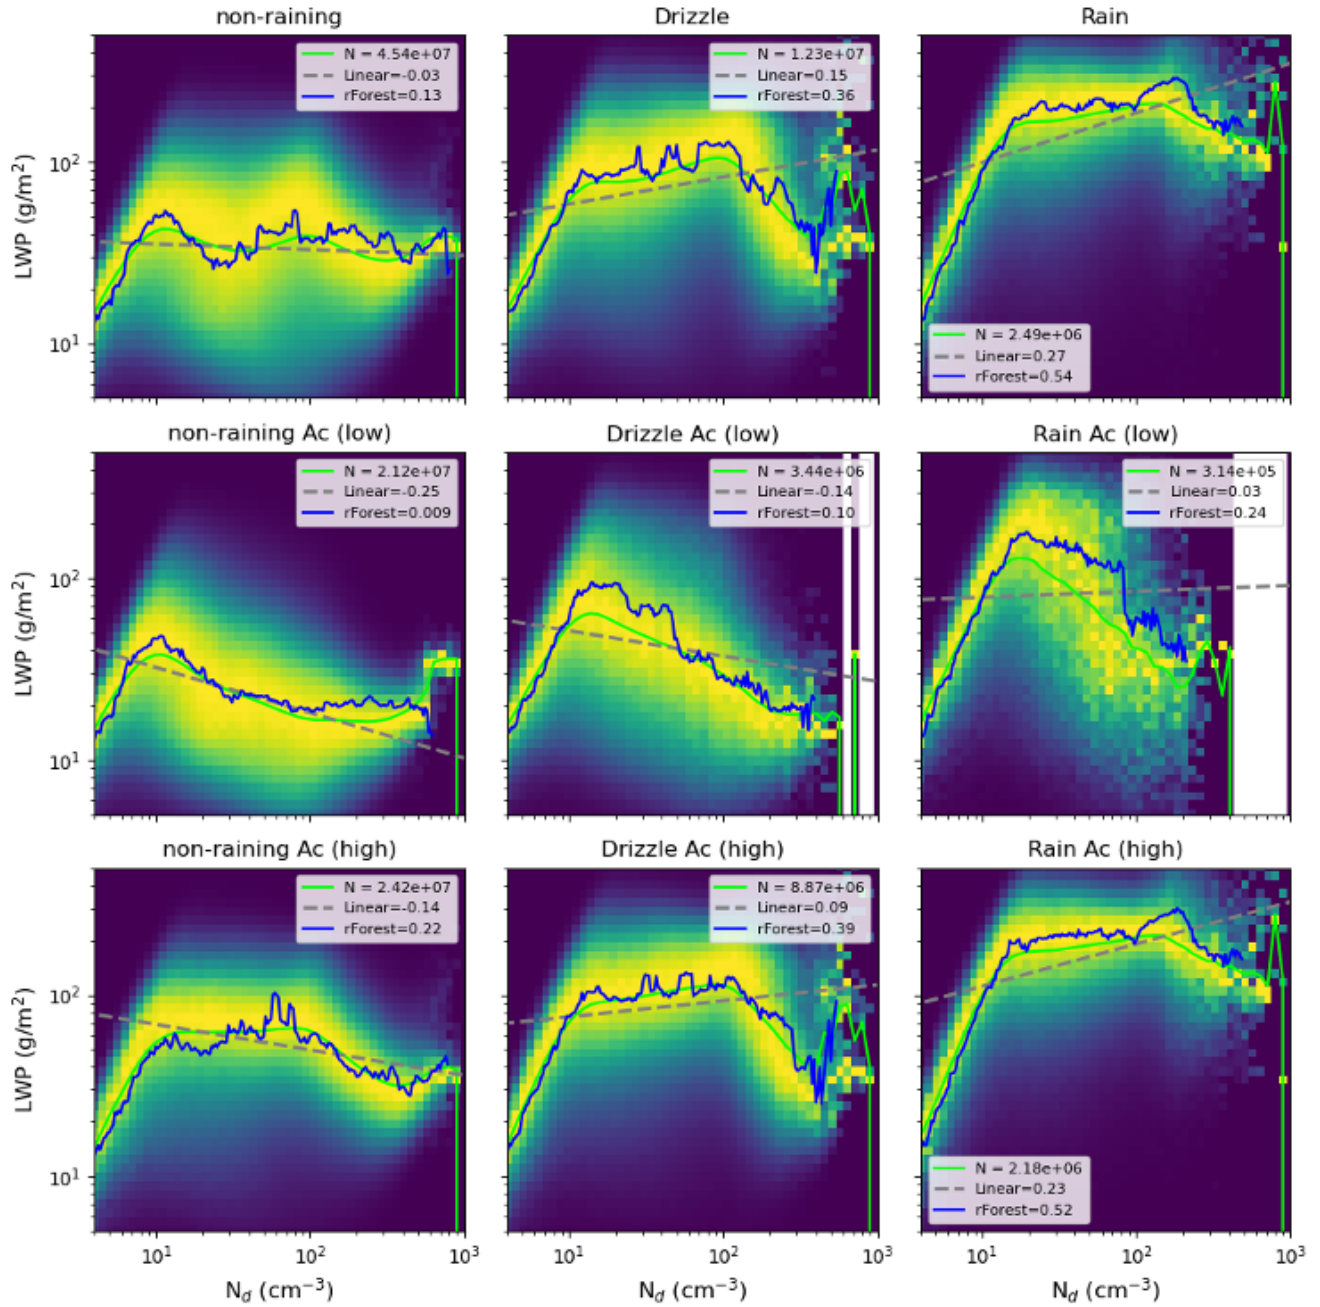

**Figure S14.** The  $N_d$ -LWP relationship plotted using the same criteria as Fig. S10 but composited by precipitation rate, 0 mm/hr (non-raining clouds) (a),  $0 < \text{Pr} < 0.05$  mm/hr (drizzle) (b), and  $0.05 < \text{Pr} < 0.2$  (rain) (c) and with each regime further composited by low cloud albedo for non-raining (d), drizzling (e), and raining (f), and high cloud albedo for non-raining (g), drizzling (h), and raining (i). An OLS fit to the observational data (dashed gray line) and to the random forest prediction (solid blue line), along with the average slope estimated by numerical differentiation of the prediction using finite differences, is displayed.

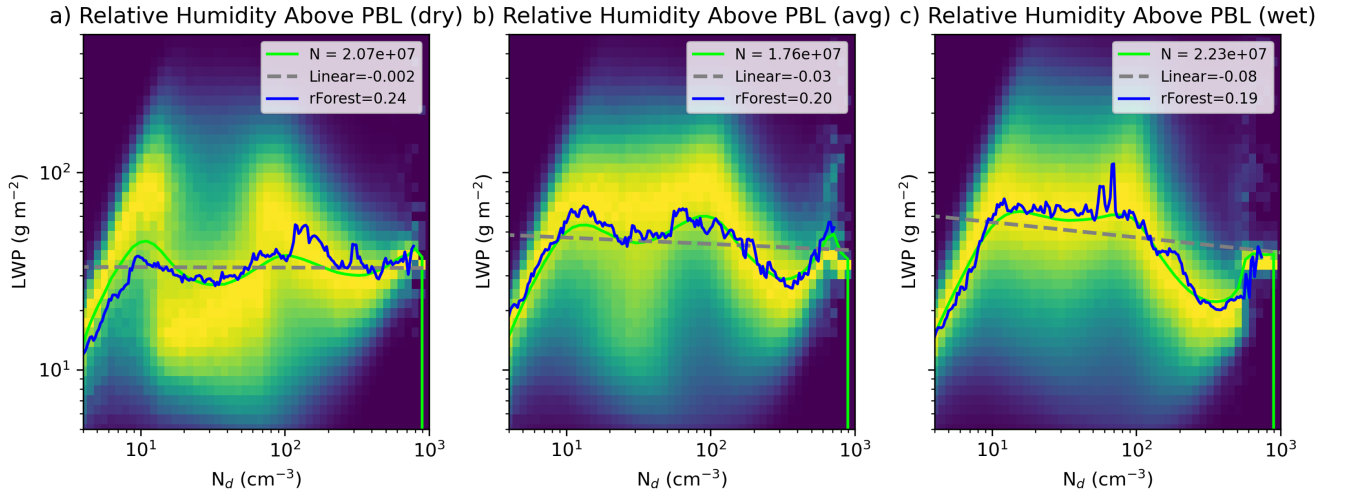

**Figure S15.** The  $N_d$ -LWP relationship is shown using the same criteria as Fig. S10, but composited by relative humidity above the boundary layer into low ( $0 < RH < 0.33$ ) (a), mid ( $0.33 < RH < 0.67$ ) (b), and high ( $0.67 < RH < 1.0$ ) (c) levels. An OLS fit to the observational data (dashed gray line) and to the random forest prediction (solid blue line), along with the average slope estimated by numerical differentiation of the prediction using finite differences, are shown for constant relative humidity values: 0.25 for dry, 0.5 for avg, and 0.9 for wet. Note, the remaining cloud controlling variables are allowed to change as a function of  $N_d$ .

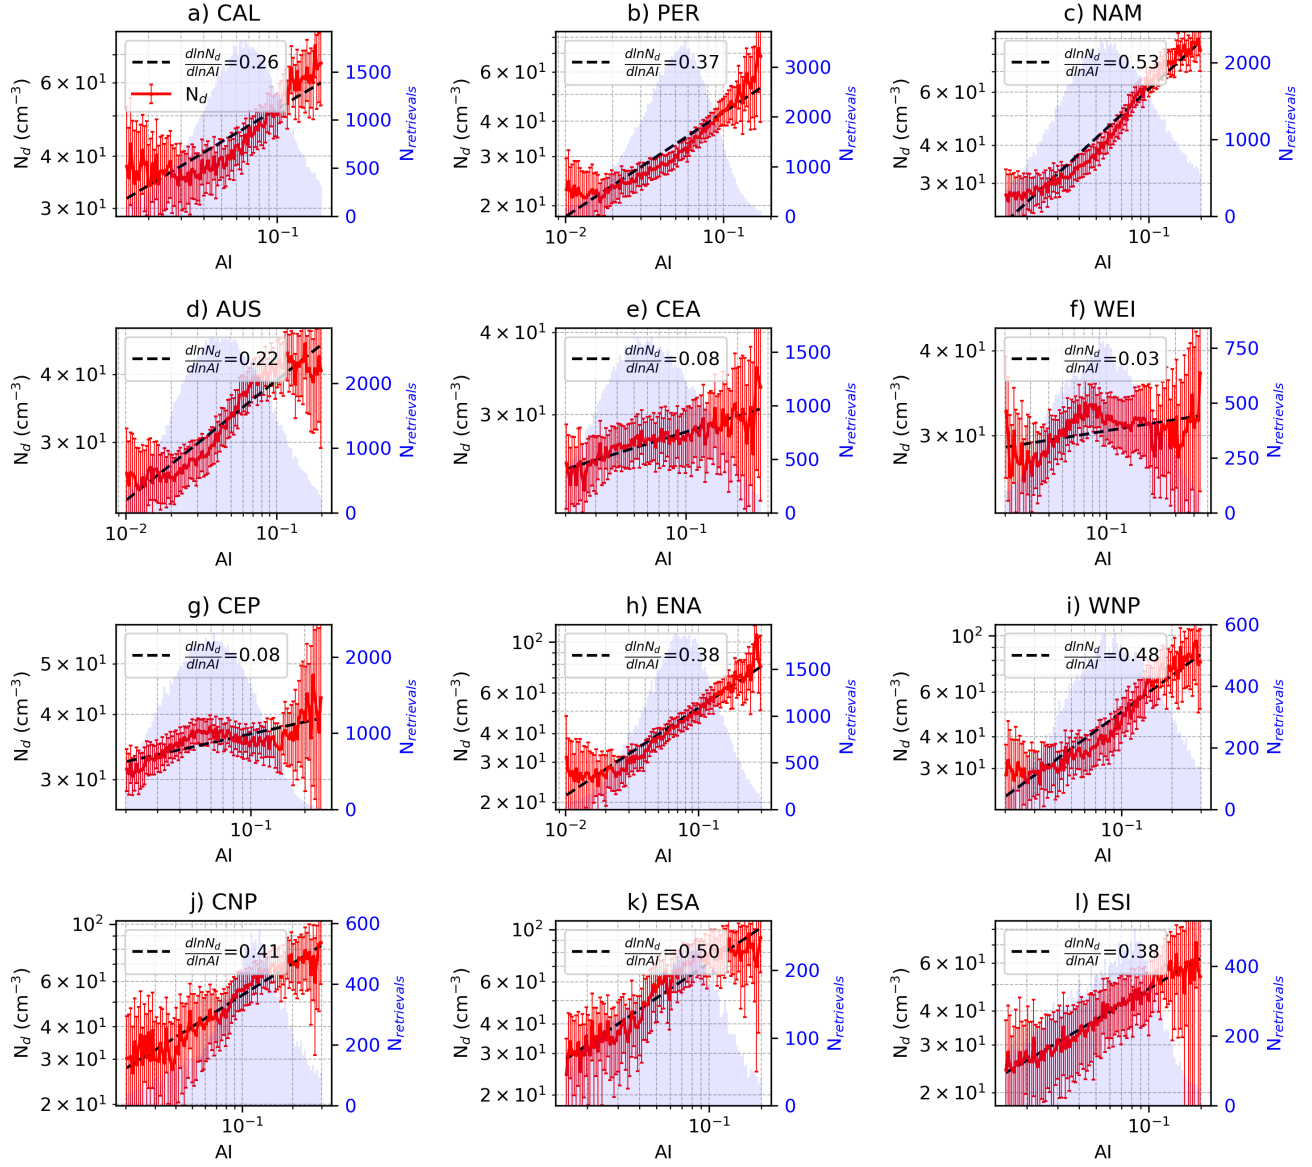

**Figure S16.** The  $AI - N_d$  relationship in each region (a-l) computed from MODIS retrievals using five years of the  $1^\circ$  gridded product. Linear least squares fit (black dashed line) and slopes ( $\frac{d \ln N_d}{d \ln AI}$ ) are provided.

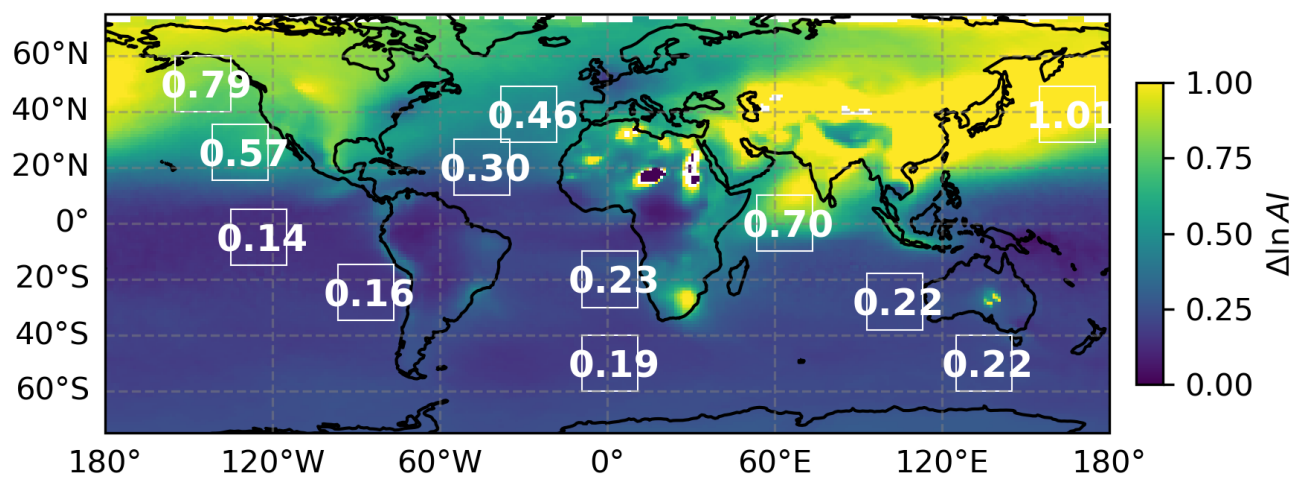

**Figure S17.** Change in aerosol index between present day and pre-industrial day conditions. Average values for each region are displayed in white.

| Resolution | $R^2$ | MPE (%) | Importance Order               |
|------------|-------|---------|--------------------------------|
| 5°         | 0.84  | 1.02    | CF, LWP, $N_d$ , CTH, TQV, RH  |
| 1°         | 0.88  | 1.50    | CF, LWP, $N_d$ , TQV, CTH, INV |
| 0.5°       | 0.87  | 1.94    | CF, LWP, $N_d$ , TQV, CTH, INV |
| 0.1°       | 0.75  | 2.76    | CF, LWP, $N_d$ , CTH, TQV, PR  |
| 0.05°      | 0.71  | 3.07    | LWP, $N_d$ , CTH, TQV, LCL, PR |

**Table S1.** Performance of the random forest model for predicting cloud albedo, evaluated using the Pearson’s coefficient ( $R^2$ ), mean percentage error (MPE), and the top six variables ranked by importance from highest to lowest.

| Resolution | $R^2$ | MPE (%) | Importance Order                             |
|------------|-------|---------|----------------------------------------------|
| 5°         | 0.7   | 39.58   | $A_{cld}$ , $N_d$ , LWP, RH, $T_{adv}$ , LCL |
| 1°         | 0.73  | 46.88   | $A_{cld}$ , $N_d$ , LWP, CTH, LCL, RH        |
| 0.5°       | 0.72  | 38.42   | $A_{cld}$ , $N_d$ , LWP, CTH, LCL, RH        |
| 0.1°       | 0.69  | 18.62   | CTH, $N_d$ , LCL, LWP, $A_{cld}$ , RH        |
| 0.05°      | 0.61  | 6.57    | CTH, $N_d$ , LCL, LWP, $A_{cld}$ , HFLX      |

**Table S2.** Performance of the random forest model for predicting cloud fraction, evaluated using the Pearson’s coefficient ( $R^2$ ), mean percentage error (MPE), and the top six variables ranked by importance from highest to lowest.

**Table S3.** List of cloud and radiative effects from aerosol perturbations at increasing grid-resolution for midlatitude clouds. Radiative scaling is defined as  $(-1.) * cf * F^\downarrow * \phi_{atm} * \frac{d \ln Nd}{d \ln AI} * d \ln AI$ .

|                                       | Grid Resolution |                |                   |                   |
|---------------------------------------|-----------------|----------------|-------------------|-------------------|
|                                       | 5°              | 1°             | 0.5°              | 0.1°              |
| Twomey [W/m <sup>2</sup> ]            | -0.83±1.04      | -1.16±0.35     | -1.40±0.27        | -1.21±0.18        |
| LWP Adjustment [W/m <sup>2</sup> ]    | 0.05±0.12       | -0.10±0.07     | -0.21±0.12        | -0.20±0.07        |
| CF Adjustment [W/m <sup>2</sup> ]     | -0.38±0.18      | -0.42±0.12     | -0.27±0.06        | -0.10±0.02        |
| RF Forcing [W/m <sup>2</sup> ]        | -1.15±1.31      | -1.68±0.44     | -1.88±0.21        | -1.51±0.13        |
| Cloud Fraction                        | 0.73±0.03       | 0.71±0.04      | 0.74±0.04         | 0.81±0.03         |
| Radiative Scaling [W/m <sup>2</sup> ] | -22.41±0.94     | -21.84±1.08    | -22.83±1.14       | -24.93±0.96       |
| $dA_{cld}/dLWP$ [m <sup>2</sup> /g]   | 0.001±2.19e-04  | 0.001±9.24e-05 | 6.75e-04±7.04e-05 | 1.94e-04±3.92e-05 |
| $dLWP/d \ln N_d$ [g/m <sup>2</sup> ]  | -1.32±4.49      | 5.14±4.04      | 14.2±7.82         | 40.5±5.54         |
| $dA_{cld}/dCF$                        | 0.25±0.09       | 0.12±0.01      | 0.07±0.01         | 0.03±0.007        |
| $dCF/d \ln N_d$                       | 0.08±0.05       | 0.16±0.03      | 0.16±0.006        | 0.13±0.008        |

**Table S4.** List of cloud and radiative effects from aerosol perturbations at increasing grid-resolution for tropical clouds. Radiative scaling is defined as  $(-1.) * cf * F^\downarrow * \phi_{atm} * \frac{d \ln Nd}{d \ln AI} * d \ln AI$ .

|                                       | Grid Resolution |                |                   |                   |
|---------------------------------------|-----------------|----------------|-------------------|-------------------|
|                                       | 5°              | 1°             | 0.5°              | 0.1°              |
| Twomey [W/m <sup>2</sup> ]            | -0.25±0.12      | -0.46±0.08     | -0.60±0.07        | -0.50±0.05        |
| LWP Adjustment [W/m <sup>2</sup> ]    | -0.07±0.006     | -0.02±0.04     | -0.02±0.04        | -0.01±0.005       |
| CF Adjustment [W/m <sup>2</sup> ]     | -0.07±0.05      | -0.12±0.02     | -0.16±0.04        | -0.06±0.03        |
| RF Forcing [W/m <sup>2</sup> ]        | -0.39±0.15      | -0.60±0.06     | -0.77±0.04        | -0.57±0.07        |
| Cloud Fraction                        | 0.30±0.05       | 0.31±0.04      | 0.36±0.04         | 0.54±0.05         |
| Radiative Scaling [W/m <sup>2</sup> ] | -9.21±1.69      | -9.39±1.14     | -11.11±1.15       | -16.76±1.46       |
| $dA_{cld}/dLWP$ [m <sup>2</sup> /g]   | 0.001±2.04e-04  | 0.001±1.47e-04 | 8.47e-04±1.04e-04 | 2.16e-04±4.88e-05 |
| $dLWP/d \ln N_d$ [g/m <sup>2</sup> ]  | 7.03±1.38       | 2.26±4.14      | 2.27±4.48         | 3.84±1.50         |
| $dA_{cld}/dCF$                        | 0.07±0.03       | 0.13±0.02      | 0.11±0.02         | 0.03±0.02         |
| $dCF/d \ln N_d$                       | 0.08±0.03       | 0.10±0.03      | 0.13±0.04         | 0.11±0.02         |
